# Supplementary material for: Multivalent bicyclic peptides are an effective antiviral modality that can potently inhibit SARS-CoV-2
Source: PubMed Central journal article supplement (PMC10275983; doi:10.1038/s41467-023-39158-1), 2023-06-16
Supplement: 41467_2023_39158_MOESM1_ESM.pdf [file 41467_2023_39158_MOESM1_ESM.pdf]

## Supplementary Information

Multivalent bicyclic peptides are an effective antiviral modality that can potently inhibit SARS-CoV-2

Katherine U Gaynor, Marina Vaysburd, Maximilian A J Harman, Anna Albecka, Phillip Jeffrey, Paul Beswick, Guido Papa, Lihong Chen, Donna Mallery, Brian McGuinness, Katerine Van Rietschoten, Steven Stanway, Paul Brear, Aleksei Lulla, Katarzyna Ciazynska, Veronica T Chang, Jo Sharp, Megan Neary, Helen Box, Jo Herriott, Edyta Kijak, Lee Tatham, Eleanor G Bentley, Parul Sharma, Adam Kirby, Ximeng Han, James P Stewart, Andrew Owen, John A. G. Briggs, Marko Hyvönen, Michael J Skynner & Leo C James

## Contents

- 3-5** Supplementary Table 1: Aligned sequences from phage sanger sequencing.
- 6** Supplementary Table 2: Domain mapping of *Bicycles* against Spike by SPR.
- 7** Supplementary Table 3: AlphaScreen competition binding to determine which *Bicycles* target overlapping epitopes.
- 8** Supplementary Table 4: AlphaScreen competition assay to determine ability of *Bicycles* to inhibit ACE2 binding.
- 9** Supplementary Table 5: Data collection and refinement statistics.
- 10** Supplementary Table 6: AlphaScreen competition assay to determine ability of multimerized E2 *Bicycles* to inhibit ACE2 binding.
- 11-12** Supplementary Table 7: List of *Bicycle* IC90s.
- 13** Supplementary Figure 1: Immunofluorescence data of *Bicycles* inhibition of SARS-CoV-2 infection and cell-cell fusion.

- 14** Supplementary Figure 2: Summary of intravenous (i.v.) and sub-cutaneous (s.c.) pharmacokinetics for E2 trimer and E2E4 biparatopic.
  
- 15** Supplementary Figure 3: Pharmacokinetic-pharmacodynamic (PKPD) models.

**Supplementary Table 1: Aligned sequences from phage sanger sequencing.**

Peptide sequences from selection against Spike, organized by epitope group.

| Epitope | Scaffold | Sequence |   |   |   |   |   |   |   |   |   |   |   |   |   |   |   |   |
|---------|----------|----------|---|---|---|---|---|---|---|---|---|---|---|---|---|---|---|---|
| 1*      | TATA     | A        | C | E | Y | V | G | P | M | C | Y | R | L | Y | C | A |   |   |
| 1       | TATA     | A        | C | E | Y | N | G | P | Y | C | Y | R | L | Y | C | A |   |   |
| 1       | TATA     | A        | C | E | Y | Q | G | P | H | C | Y | R | L | Y | C | A |   |   |
| 2*      | TCMT     | A        | C | P | Y | V | A | G | R | G | T | C | L | L | C | A |   |   |
| 2       | TCMT     | A        | C | P | F | K | P | G | V | G | T | C | L | L | C | A |   |   |
| 2       | TCMT     | A        | C | P | F | P | P | G | M | G | T | C | L | L | C | A |   |   |
| 2       | TCMT     | A        | C | P | H | M | P | G | S | G | T | C | L | L | C | A |   |   |
| 2       | TCMT     | A        | C | P | H | P | P | G | R | G | T | C | L | L | C | A |   |   |
| 2       | TCMT     | A        | C | P | H | Q | P | G | F | G | T | C | L | L | C | A |   |   |
| 2       | TCMT     | A        | C | P | W | E | A | G | K | G | T | C | L | L | C | A |   |   |
| 2       | TCMT     | A        | C | P | Y | A | P | G | M | G | T | C | L | L | C | A |   |   |
| 2       | TCMT     | A        | C | P | Y | A | P | G | N | G | T | C | L | L | C | A |   |   |
| 2       | TCMT     | A        | C | P | Y | L | A | G | T | G | T | C | L | L | C | A |   |   |
| 2       | TCMT     | A        | C | P | Y | N | A | G | T | G | T | C | L | L | C | A |   |   |
| 2       | TCMT     | A        | C | P | Y | N | K | G | E | G | T | C | L | L | C | A |   |   |
| 2       | TCMT     | A        | C | P | Y | Q | P | G | S | G | T | C | L | L | C | A |   |   |
| 2       | TCMT     | A        | C | P | Y | R | E | G | T | G | T | C | L | L | C | A |   |   |
| 2       | TCMT     | A        | C | P | Y | S | P | G | Q | G | T | C | L | L | C | A |   |   |
| 2       | TCMT     | A        | C | P | Y | S | P | G | S | G | T | C | L | L | C | A |   |   |
| 2       | TCMT     | A        | C | L | Y | P | P | G | K | G | T | C | L | L | C | A |   |   |
| 2       | TCMT     | A        | C | P | S | P | A | G | R | G | T | C | L | L | C | A |   |   |
| 2b*     | TATA     | A        | C | M | F | V | P | C | A | V | R | H | A | L | G | L | C | A |
| 2b      | TATA     | A        | C | M | F | T | P | C | H | V | R | E | I | L | G | L | C | A |
| 2b      | TATA     | A        | C | M | F | V | P | C | A | A | R | H | E | L | G | L | C | A |
| 2b      | TATA     | A        | C | M | F | V | P | C | A | A | R | V | E | L | G | L | C | A |
| 2b      | TATA     | A        | C | M | F | V | P | C | A | I | R | Q | T | L | G | L | C | A |
| 2b      | TATA     | A        | C | M | F | V | P | C | A | T | R | H | E | L | G | L | C | A |
| 2b      | TATA     | A        | C | M | F | V | P | C | A | T | R | H | Q | L | G | L | C | A |
| 2b      | TATA     | A        | C | M | F | V | P | C | A | T | R | H | S | L | G | L | C | A |
| 2b      | TATA     | A        | C | M | F | V | P | C | A | T | R | L | A | L | G | L | C | A |
| 2b      | TATA     | A        | C | M | F | V | P | C | A | T | R | L | Q | L | G | L | C | A |
| 2b      | TATA     | A        | C | M | F | V | P | C | A | T | R | Q | E | L | G | L | C | A |
| 2b      | TATA     | A        | C | M | F | V | P | C | A | T | R | Q | M | L | G | L | C | A |
| 2b      | TATA     | A        | C | M | F | V | P | C | A | T | R | V | A | L | G | L | C | A |
| 2b      | TATA     | A        | C | M | F | V | P | C | A | T | R | V | A | L | G | L | C | A |
| 2b      | TATA     | A        | C | M | F | V | P | C | A | V | R | E | E | L | G | L | C | A |
| 2b      | TATA     | A        | C | M | F | V | P | C | A | V | R | E | I | L | G | L | C | A |
| 2b      | TATA     | A        | C | M | F | V | P | C | A | V | R | H | S | L | G | L | C | A |
| 2b      | TATA     | A        | C | M | F | V | P | C | A | V | R | K | D | L | G | L | C | A |
| 2b      | TATA     | A        | C | M | F | V | P | C | A | V | R | Q | T | L | G | L | C | A |
| 2b      | TATA     | A        | C | M | G | V | P | C | K | V | R | E | I | L | G | L | C | A |
| 3*      | TATA     | A        | C | E | D | N | D | W | V | Y | C | S | T | C | A |   |   |   |
| 3       | TATA     | A        | C | E | D | H | D | W | V | Y | C | S | T | C | A |   |   |   |
| 3       | TATA     | A        | C | E | S | N | D | W | V | Y | C | S | T | C | A |   |   |   |
| 3       | TATA     | A        | C | L | D | E | T | W | I | Y | C | S | T | C | A |   |   |   |
| 3       | TATA     | A        | C | P | D | E | T | W | V | Y | C | S | T | C | A |   |   |   |

|    |      |   |   |   |   |   |   |   |   |   |   |   |   |   |   |   |   |   |
|----|------|---|---|---|---|---|---|---|---|---|---|---|---|---|---|---|---|---|
| 3  | TATA | A | C | P | D | V | S | W | I | Y | C | S | T | C | A |   |   |   |
| 3  | TATA | A | C | E | Q | N | G | W | I | Y | C | S | T | C | A |   |   |   |
| 3  | TATA | A | C | P | N | I | S | W | I | Y | C | S | T | C | A |   |   |   |
| 3  | TATA | A | C | T | D | R | S | W | I | F | C | S | T | C | A |   |   |   |
| 3  | TATA | A | C | A | P | T | S | G | W | I | Y | C | S | T | C | A |   |   |
| 3  | TATA | A | C | G | R | D | S | S | W | I | Y | C | S | T | C | A |   |   |
| 3  | TATA | A | C | P | E | A | N | S | W | V | Y | C | S | T | C | A |   |   |
| 3  | TATA | A | C | R | G | T | P | A | W | K | A | C | A | I | C | A |   |   |
| 4* | TATB | A | C | I | P | L | D | W | T | C | M | I | A | C | A |   |   |   |
| 4  | TATA | A | C | K | I | H | D | W | T | C | L | L | R | C | A |   |   |   |
| 4  | TATB | A | C | D | W | T | C | Y | F | R | P | L | P | C | A |   |   |   |
| 4  | TATB | A | C | D | W | T | C | Y | L | R | P | L | P | C | A |   |   |   |
| 4  | TATB | A | C | D | W | T | C | Y | L | T | M | M | P | C | A |   |   |   |
| 4  | TATB | A | C | D | W | T | C | Y | M | S | M | K | P | C | A |   |   |   |
| 4  | TATB | A | C | D | W | T | C | Y | I | S | P | M | F | D | C | A |   |   |
| 4  | TATB | A | C | D | W | T | C | Y | L | N | I | Y | H | E | C | A |   |   |
| 4  | TATB | A | C | D | W | T | C | Y | L | R | I | H | E | A | C | A |   |   |
| 4  | TATB | A | C | D | W | T | C | Y | M | D | Y | L | S | N | C | A |   |   |
| 4  | TATB | A | C | D | W | T | C | Y | M | R | I | N | D | A | C | A |   |   |
| 4  | TCMT | A | C | D | W | T | C | Y | I | N | I | Y | N | T | C | A |   |   |
| 4  | TCMT | A | C | F | D | D | W | T | C | Y | I | Q | M | C | A |   |   |   |
| 5* | TATB | A | C | A | N | P | D | N | P | V | C | R | F | Y | C | A |   |   |
| 5  | TATB | A | C | A | N | H | D | N | P | V | C | R | F | Y | C | A |   |   |
| 5  | TATB | A | C | A | S | P | D | N | P | V | C | R | F | Y | C | A |   |   |
| 5  | TATB | A | C | E | N | M | D | N | P | V | C | R | F | Y | C | A |   |   |
| 5  | TATB | A | C | F | N | I | D | N | P | V | C | R | F | Y | C | A |   |   |
| 5  | TATB | A | C | H | N | L | E | N | P | V | C | R | F | Y | C | A |   |   |
| 5  | TATB | A | C | H | N | P | S | N | P | V | C | R | F | Y | C | A |   |   |
| 5  | TATB | A | C | K | N | Y | E | N | P | V | C | R | F | Y | C | A |   |   |
| 5  | TATB | A | C | L | N | A | E | N | P | V | C | R | F | Y | C | A |   |   |
| 5  | TATB | A | C | L | N | K | H | N | P | V | C | R | F | Y | C | A |   |   |
| 5  | TATB | A | C | L | N | P | E | N | P | V | C | R | F | Y | C | A |   |   |
| 5  | TATB | A | C | L | N | V | E | N | P | V | C | R | F | Y | C | A |   |   |
| 5  | TATB | A | C | M | N | A | A | N | P | V | C | R | F | Y | C | A |   |   |
| 5  | TATB | A | C | M | N | E | D | N | P | V | C | R | F | Y | C | A |   |   |
| 5  | TATB | A | C | M | N | P | D | N | P | V | C | R | F | Y | C | A |   |   |
| 5  | TATB | A | C | M | N | T | D | N | P | V | C | R | F | Y | C | A |   |   |
| 5  | TATB | A | C | N | N | P | A | N | P | V | C | R | F | Y | C | A |   |   |
| 5  | TATB | A | C | Q | N | P | G | N | P | V | C | R | F | Y | C | A |   |   |
| 5  | TATB | A | C | R | N | P | E | N | P | V | C | R | F | Y | C | A |   |   |
| 5  | TATB | A | C | S | N | P | E | N | P | V | C | R | F | Y | C | A |   |   |
| 5  | TATB | A | C | Y | N | Q | E | N | P | V | C | R | F | Y | C | A |   |   |
| 6* | TATB | A | C | D | H | Y | H | C | P | W | L | A | L | G | G | S | C | A |
| 7* | TATB | A | C | I | N | P | Y | C | E | H | H | I | Y | L | E | H | C | A |
| 9* | TATB | A | C | M | N | P | F | F | Y | D | C | E | T | V | C | A |   |   |
| 9  | TATB | A | C | M | N | P | F | F | Y | D | C | D | H | I | C | A |   |   |
| 9  | TATB | A | C | M | N | P | F | F | Y | D | C | E | D | R | C | A |   |   |

|     |      |   |          |          |          |          |          |          |          |          |          |          |   |          |          |   |          |   |
|-----|------|---|----------|----------|----------|----------|----------|----------|----------|----------|----------|----------|---|----------|----------|---|----------|---|
| 9   | TATB | A | <b>C</b> | <b>M</b> | <b>N</b> | <b>P</b> | <b>F</b> | <b>F</b> | <b>Y</b> | <b>D</b> | <b>C</b> | E        | E | I        | <b>C</b> | A |          |   |
| 9   | TATB | A | <b>C</b> | <b>M</b> | <b>N</b> | <b>P</b> | <b>F</b> | <b>F</b> | <b>Y</b> | <b>D</b> | <b>C</b> | E        | N | P        | <b>C</b> | A |          |   |
| 9   | TATB | A | <b>C</b> | <b>M</b> | <b>N</b> | <b>P</b> | <b>F</b> | <b>F</b> | <b>Y</b> | <b>D</b> | <b>C</b> | E        | R | T        | <b>C</b> | A |          |   |
| 9   | TATB | A | <b>C</b> | <b>M</b> | <b>N</b> | <b>P</b> | <b>F</b> | <b>F</b> | <b>Y</b> | <b>D</b> | <b>C</b> | E        | Y | V        | <b>C</b> | A |          |   |
| 9   | TATB | A | <b>C</b> | <b>M</b> | <b>N</b> | <b>P</b> | <b>F</b> | <b>F</b> | <b>Y</b> | <b>D</b> | <b>C</b> | H        | E | Q        | <b>C</b> | A |          |   |
| 9   | TATB | A | <b>C</b> | <b>M</b> | <b>N</b> | <b>P</b> | <b>F</b> | <b>F</b> | <b>Y</b> | <b>D</b> | <b>C</b> | K        | V | V        | <b>C</b> | A |          |   |
| 9   | TATB | A | <b>C</b> | <b>M</b> | <b>N</b> | <b>P</b> | <b>F</b> | <b>Y</b> | <b>Y</b> | <b>D</b> | <b>C</b> | E        | E | V        | <b>C</b> | A |          |   |
| 11* | TCMT | A | <b>C</b> | <b>F</b> | <b>P</b> | <b>E</b> | <b>P</b> | <b>W</b> | <b>L</b> | <b>G</b> | <b>L</b> | <b>C</b> | T | <b>P</b> | <b>C</b> | A |          |   |
| 11  | TCMT | A | <b>C</b> | <b>F</b> | <b>P</b> | <b>A</b> | <b>P</b> | <b>W</b> | <b>L</b> | <b>G</b> | <b>L</b> | <b>C</b> | T | <b>P</b> | <b>C</b> | A |          |   |
| 12* | TATA | A | <b>C</b> | <b>S</b> | <b>S</b> | <b>K</b> | <b>F</b> | <b>C</b> | <b>D</b> | <b>A</b> | <b>W</b> | W        | N | <b>F</b> | <b>N</b> | R | <b>C</b> | A |
| 12  | TATA | A | <b>C</b> | <b>S</b> | <b>D</b> | <b>A</b> | <b>F</b> | <b>C</b> | <b>S</b> | <b>A</b> | <b>W</b> | W        | G | <b>F</b> | <b>N</b> | Q | <b>C</b> | A |
| 12  | TATA | A | <b>C</b> | <b>S</b> | <b>D</b> | <b>D</b> | <b>F</b> | <b>C</b> | <b>S</b> | <b>A</b> | <b>W</b> | W        | G | <b>F</b> | <b>N</b> | H | <b>C</b> | A |
| 12  | TATA | A | <b>C</b> | <b>S</b> | <b>D</b> | <b>E</b> | <b>F</b> | <b>C</b> | <b>S</b> | <b>A</b> | <b>W</b> | W        | G | <b>F</b> | <b>N</b> | E | <b>C</b> | A |
| 12  | TATA | A | <b>C</b> | <b>S</b> | <b>N</b> | <b>K</b> | <b>F</b> | <b>C</b> | <b>D</b> | <b>A</b> | <b>W</b> | W        | N | <b>F</b> | <b>N</b> | R | <b>C</b> | A |

---

\* denotes the lead sequence as described in Table 1. Note for Epitope 6 and 7, these sequences appeared as "singletons" with no similar motifs appearing in outputs.

text in bold denotes conserved residues

**Supplementary Table 2: Domain mapping of *Bicycles* against Spike by SPR.** *Bicycle* representatives of each epitope were screened against six protein constructs; Spike Trimer, S1, S1-RBD, S1-NTD, S2 and ACE2. The equilibrium dissociation constant ( $K_D$ ) is displayed as a geometric mean (geomean) value (N=3) with upper (UCI) and lower (LCI) confidence intervals.

| <b>Bicycle (Epitope)</b> | <b>Protein Construct</b> | <b>Geomean <math>K_D</math> (nM)</b> | <b>Lower 95% CI (nM)</b> | <b>Upper 95% CI (nM)</b> | <b>N</b> |
|--------------------------|--------------------------|--------------------------------------|--------------------------|--------------------------|----------|
| BCY17548 (E1)            | Spike Trimer             | 6200                                 | 8200                     | 4600                     | 3        |
|                          | S1                       | 5100                                 | 15000                    | 1800                     | 3        |
|                          | S1-RBD                   | 3600                                 | 5000                     | 2600                     | 3        |
|                          | S1-NTD                   | >                                    | -                        | -                        | 3        |
|                          | S2                       | >                                    | -                        | -                        | 3        |
|                          | ACE2                     | >                                    | -                        | -                        | 3        |
| BCY16591 (E2)            | Spike Trimer             | 730                                  | 1100                     | 490                      | 3        |
|                          | S1                       | 830                                  | 1100                     | 620                      | 3        |
|                          | S1-RBD                   | 650                                  | 1300                     | 310                      | 3        |
|                          | S1-NTD                   | >                                    | -                        | -                        | 3        |
|                          | S2                       | >                                    | -                        | -                        | 3        |
|                          | ACE2                     | >                                    | -                        | -                        | 3        |
| BCY17543 (E3)            | Spike Trimer             | 5100                                 | 15000                    | 1700                     | 3        |
|                          | S1                       | 2500                                 | 7000                     | 910                      | 3        |
|                          | S1-RBD                   | 2300                                 | 4500                     | 1200                     | 3        |
|                          | S1-NTD                   | >                                    | -                        | -                        | 3        |
|                          | S2                       | >                                    | -                        | -                        | 3        |
|                          | ACE2                     | >                                    | -                        | -                        | 3        |
| BCY18150 (E9)            | Spike Trimer             | 3100                                 | 3300                     | 2800                     | 3        |
|                          | S1                       | 3800                                 | 6000                     | 2400                     | 3        |
|                          | S1-RBD                   | 4100                                 | 7300                     | 2300                     | 3        |
|                          | S1-NTD                   | >                                    | -                        | -                        | 3        |
|                          | S2                       | >                                    | -                        | -                        | 3        |
|                          | ACE2                     | >                                    | -                        | -                        | 3        |
| BCY15466 (E4)            | Spike Trimer             | 110                                  | 290                      | 42                       | 3        |
|                          | S1                       | 2900                                 | 28000                    | 300                      | 3        |
|                          | S1-RBD                   | >                                    | -                        | -                        | 3        |
|                          | S1-NTD                   | 440                                  | 1000                     | 190                      | 3        |
|                          | S2                       | >                                    | -                        | -                        | 3        |
|                          | ACE2                     | >                                    | -                        | -                        | 3        |
| BCY16107 (E6)            | Spike Trimer             | 970                                  | 3800                     | 250                      | 3        |
|                          | S1                       | >                                    | -                        | -                        | 3        |
|                          | S1-RBD                   | >                                    | -                        | -                        | 3        |
|                          | S1-NTD                   | 3900                                 | 6100                     | 2500                     | 3        |
|                          | S2                       | >                                    | -                        | -                        | 3        |
|                          | ACE2                     | >                                    | -                        | -                        | 3        |
| BCY16115 (E7)            | Spike Trimer             | 3200                                 | 3800                     | 2700                     | 3        |
|                          | S1                       | >                                    | -                        | -                        | 3        |
|                          | S1-RBD                   | >                                    | -                        | -                        | 3        |
|                          | S1-NTD                   | 4000                                 | 6400                     | 2500                     | 3        |
|                          | S2                       | >                                    | -                        | -                        | 3        |
|                          | ACE2                     | >                                    | -                        | -                        | 3        |
| BCY16903 (E5)            | Spike Trimer             | 15                                   | 150                      | 1.6                      | 2        |
|                          | S1                       | 24                                   | 240                      | 2.4                      | 2        |
|                          | S1-RBD                   | >                                    | -                        | -                        | 3        |
|                          | S1-NTD                   | >                                    | -                        | -                        | 3        |
|                          | S2                       | >                                    | -                        | -                        | 3        |
|                          | ACE2                     | >                                    | -                        | -                        | 3        |
| BCY19905 (E11)           | Spike Trimer             | 450                                  | 1000                     | 190                      | 3        |
|                          | S1                       | >                                    | -                        | -                        | 3        |
|                          | S1-RBD                   | >                                    | -                        | -                        | 3        |
|                          | S1-NTD                   | >                                    | -                        | -                        | 3        |
|                          | S2                       | 530                                  | 780                      | 360                      | 3        |
|                          | ACE2                     | >                                    | -                        | -                        | 3        |
| BCY19901 (E12)           | Spike Trimer             | 610                                  | 700                      | 530                      | 3        |
|                          | S1                       | >                                    | -                        | -                        | 3        |
|                          | S1-RBD                   | >                                    | -                        | -                        | 3        |
|                          | S1-NTD                   | >                                    | -                        | -                        | 3        |
|                          | S2                       | 810                                  | 1200                     | 530                      | 3        |
|                          | ACE2                     | >                                    | -                        | -                        | 3        |

**Supplementary Table 3: AlphaScreen competition binding to determine which *Bicycles* target overlapping epitopes.** Unmodified *Bicycle* representatives of each epitope were competed against representative biotinylated *Bicycles* of each epitope binding a certain Spike protein construct dependent on the domain mapping profile. The half maximal inhibitory concentration ( $IC_{50}$ ) is displayed as the arithmetic mean average of two technical replicates.

| <b>Bicycle ID (Epitope)</b> | <b>Biotinylated Bicycle (Epitope)</b> | <b>Spike Domain</b> | <b><math>IC_{50}</math> (<math>\mu</math>M)</b> | <b>n</b> |
|-----------------------------|---------------------------------------|---------------------|-------------------------------------------------|----------|
| BCY15354 (E1)               |                                       |                     | 0.36                                            | 2        |
| BCY16591 (E2)               | BCY15762 (E1)                         | S1                  | 0.11                                            | 2        |
| BCY15231 (E3)               |                                       |                     | 0.31                                            | 2        |
| BCY16207 (E9)               |                                       |                     | -                                               | 2        |
| BCY15354 (E1)               |                                       |                     | 1.6                                             | 2        |
| BCY16591 (E2)               | BCY15760 (E2)                         | S1                  | 0.35                                            | 2        |
| BCY15231 (E3)               |                                       |                     | -                                               | 2        |
| BCY16207 (E9)               |                                       |                     | -                                               | 2        |
| BCY15354 (E1)               |                                       |                     | 0.55                                            | 2        |
| BCY16591 (E2)               | BCY15763 (E3)                         | S1                  | -                                               | 2        |
| BCY15231 (E3)               |                                       |                     | 0.40                                            | 2        |
| BCY16207 (E9)               |                                       |                     | 1.1                                             | 2        |
| BCY16107 (E6)               |                                       |                     | 0.20                                            | 2        |
| BCY16115 (E7)               | BCY16257 (E6)                         | S-Trimer            | -                                               | 2        |
| BCY16107 (E6)               |                                       |                     | 1.0                                             | 2        |
| BCY16115 (E7)               | BCY16274 (E7)                         | S-Trimer            | -                                               | 2        |
| BCY19905 (E11)              |                                       |                     | 0.064                                           | 2        |
| BCY19901 (E12)              | BCY19320 (E11)                        | S2                  | -                                               | 2        |
| BCY19905 (E11)              |                                       |                     | -                                               | 2        |
| BCY19901 (E12)              | BCY19908 (E12)                        | S2                  | 0.22                                            | 2        |
| BCY19905 (E11)              |                                       |                     | -                                               | 2        |

**Supplementary Table 4: AlphaScreen competition assay to determine ability of *Bicycles* to inhibit ACE2 binding.** Unmodified monomeric *Bicycle* representatives of each epitope were competed against Spike Trimer:ACE2 binding interaction. The half maximal inhibitory concentration ( $IC_{50}$ ) is displayed as a geometric mean (geomean) value (minimum N=2) with upper (UCI) and lower (LCI) confidence intervals. A non-Spike binding Bicycle was used as a negative control.

| <b>Bicycle ID</b> | <b>Epitope</b> | <b>Multimeric State</b> | <b>Geomean <math>IC_{50}</math> (nM)</b> | <b>Lower 95% CI (nM)</b> | <b>Upper 95% CI (nM)</b> | <b>N</b> |
|-------------------|----------------|-------------------------|------------------------------------------|--------------------------|--------------------------|----------|
| -ve Control       | Non-binder     | Monomer                 | >21000                                   | -                        | -                        | 6        |
| BCY17548          | E1             | Monomer                 | >20000                                   | -                        | -                        | 2        |
| BCY16591          | E2             | Monomer                 | 520                                      | 360                      | 750                      | 4        |
| BCY17543          | E3             | Monomer                 | >20000                                   | -                        | -                        | 2        |
| BCY15446          | E4             | Monomer                 | >16000                                   | -                        | -                        | 2        |
| BCY16903          | E5             | Monomer                 | >20000                                   | -                        | -                        | 2        |
| BCY16107          | E6             | Monomer                 | >20000                                   | -                        | -                        | 2        |
| BCY16115          | E7             | Monomer                 | >14000                                   | -                        | -                        | 2        |
| BCY18150          | E9             | Monomer                 | >20000                                   | -                        | -                        | 2        |
| BCY19905          | E11            | Monomer                 | >20000                                   | -                        | -                        | 2        |
| BCY19901          | E12            | Monomer                 | >20000                                   | -                        | -                        | 2        |



**Supplementary Table 5: Data collection and refinement statistics.** RBD complexes with *Bicycle* ligands. Statistics for both data integration and model refinement are given (values for the highest resolution shell are given in parentheses).

|                                                 | sRBD:E2                   | sRBD:E2b                 |
|-------------------------------------------------|---------------------------|--------------------------|
| PDB code                                        | 7Z8O                      | 8AAA                     |
| <b>Data collection</b>                          |                           |                          |
| Wavelength (Å)                                  | 0.8                       | 0.98                     |
| Temperature (K)                                 | 100                       | 100                      |
| Beamline                                        | Diamond Light Source I04  | Diamond Light Source I04 |
| Detector                                        | Eiger2 XE 16M             | Eiger2 XE 16M            |
| Rotation per image (°)                          | 0.1                       | 0.05                     |
| Total rotation range (°)                        | 300                       | 360                      |
| Exposure time per image (s)                     | 0.05                      | 0.02                     |
| Space group                                     | $P2_12_12_1$              | $P32 21$                 |
| a, b, c (Å)                                     | 44.2 55.7 82.7            | 112.2 112.2 35.5         |
| $\alpha, \beta, \gamma$ (°)                     | 90, 90, 90                | 90, 90, 120              |
| Resolution range                                | 46.2 - 0.96 (0.98 - 0.96) | 56.1 - 1.9 (1.97 - 1.90) |
| Total No of reflections                         | 2313853 (34008)           | 266723 (10644)           |
| No of unique reflections                        | 123986 (5517)             | 13749 (686)              |
| Completeness                                    | 99.2 (90.4)               | 91.5 (65.2)              |
| Multiplicity                                    | 18.7 (6.2)                | 19.4 (15.5)              |
| $\langle I \rangle / \langle \sigma(I) \rangle$ | 19.6 (0.9)                | 9.3 (1.9)                |
| $R_{\text{merge}}$                              | 0.06 (1.51)               | 0.25 (1.68)              |
| $CC_{1/2}$                                      | 1.00 (0.37)               | 0.99 (0.86)              |
| <b>Refinement</b>                               |                           |                          |
| Rfactor                                         | 0.1191 (0.342)            | 0.181 (0.394)            |
| R-free                                          | 0.1334 (0.301)            | 0.2276 (0.3432)          |
| R.m.s. deviations (angle, °)                    | 1.99                      | 0.94                     |
| R.m.s. deviations (length, Å)                   | 0.017                     | 0.008                    |
| Ramachandran plot                               |                           |                          |
| Ramachandran favored (%)                        | 97.47                     | 95.63                    |
| Ramachandran allowed (%)                        | 2.53                      | 4.37                     |
| Ramachandran outliers (%)                       | 0                         | 0                        |
| Average B-factor                                | 16.4                      | 35.8                     |
| macromolecules                                  | 14.2                      | 35.8                     |
| ligands                                         | 15.3                      | 35.1                     |
| solvent                                         | 28                        | 35.5                     |

**Supplementary Table 6: AlphaScreen competition assay to determine ability of multimerized E2 Bicycles to inhibit ACE2 binding.** E2 *Bicycle* of constant sequence and variable multimeric state were competed against Spike Trimer:ACE2 binding interaction. The half maximal inhibitory concentration ( $IC_{50}$ ) is displayed as a geometric mean (geomean) value (minimum N=2) with upper (UCI) and lower (LCI) confidence intervals. A non-Spike binding Bicycle was used as a negative control. The lower limit of quantification (LoQ) was defined as [Spike Protein]/2, in this case equal to 0.1 nM.

| <b>Bicycle ID</b> | <b>Epitope</b> | <b>Multimeric State</b> | <b>Geomean <math>IC_{50}</math> (nM)</b> | <b>Lower 95% CI (nM)</b> | <b>Upper 95% CI (nM)</b> | <b>N</b> |
|-------------------|----------------|-------------------------|------------------------------------------|--------------------------|--------------------------|----------|
| -ve Control       | Non-binder     | Monomer                 | >21000                                   | -                        | -                        | 6        |
| BCY16591          | E2             | Monomer                 | 520                                      | 360                      | 750                      | 4        |
| BCY17023          | E2             | Homodimer               | 0.74                                     | 0.047                    | 12                       | 2        |
| BCY17021          | E2             | Homotrimer              | 0.075*                                   | 0.014                    | 0.42                     | 2        |
| BCY17022          | E2             | Homotetramer            | 0.096*                                   | 0.094                    | 0.097                    | 2        |

\*LoQ = 0.1 nM

**Supplementary Table 7: List of *Bicycle* IC90s.** IC90 values are given by figure panel for each Bicycle as calculated from each dose-response fit.

| <b>Figure 2B</b> |                       |
|------------------|-----------------------|
| <b>Bicycle</b>   | <b>IC90 (M)</b>       |
| E2 Monomer       | $1.6 \times 10^{-2}$  |
| E2 Dimer         | $7.3 \times 10^{-5}$  |
| E2 Trimer        | $7.2 \times 10^{-7}$  |
| E2 Tetramer      | $4.3 \times 10^{-7}$  |
| <b>Figure 2C</b> |                       |
| <b>Bicycle</b>   | <b>IC90 (M)</b>       |
| PEG1             | $2.6 \times 10^{-8}$  |
| PEG5             | $5.3 \times 10^{-8}$  |
| PEG10            | $4.9 \times 10^{-8}$  |
| PEG23            | $1.3 \times 10^{-7}$  |
| <b>Figure 2D</b> |                       |
| <b>Bicycle</b>   | <b>IC90 (M)</b>       |
| E3 Trimer        | $8.3 \times 10^{-6}$  |
| E5 Trimer        | $2.2 \times 10^{-6}$  |
| <b>Figure 2E</b> |                       |
| <b>Bicycle</b>   | <b>IC90 (M)</b>       |
| E1E2             | $7.6 \times 10^{-4}$  |
| E2E3             | $1.6 \times 10^{-6}$  |
| E1E5             | $8.3 \times 10^{-6}$  |
| E2E5             | $1.8 \times 10^{-7}$  |
| E3E5             | $1.1 \times 10^{-6}$  |
| <b>Figure 2G</b> |                       |
| <b>Bicycle</b>   | <b>IC90 (M)</b>       |
| E1E4             | $6.3 \times 10^{-6}$  |
| E2E4             | $8.3 \times 10^{-8}$  |
| E3E4             | $1.9 \times 10^{-6}$  |
| E4E5             | $2.4 \times 10^{-6}$  |
| <b>Figure 3A</b> |                       |
| <b>Bicycle</b>   | <b>IC90 (M)</b>       |
| E2 Trimer        | $3.9 \times 10^{-9}$  |
| E2E4             | $8.1 \times 10^{-9}$  |
| <b>Figure 3B</b> |                       |
| <b>Bicycle</b>   | <b>IC90 (M)</b>       |
| E2               | $2.1 \times 10^{-7}$  |
| E2E4             | $8.9 \times 10^{-7}$  |
| <b>Figure 3C</b> |                       |
| <b>Bicycle</b>   | <b>IC90 (M)</b>       |
| E2               | $2.56 \times 10^{-8}$ |
| E2E4             | $2.17 \times 10^{-8}$ |
| <b>Figure 4B</b> |                       |

| <b>Bicycle</b>   | <b>IC90 (M)</b>      |
|------------------|----------------------|
| Beta             | $2.7 \times 10^{-4}$ |
| Beta 484         | $7.3 \times 10^{-8}$ |
| Delta            | $1.4 \times 10^{-4}$ |
| Delta 452        | $5.1 \times 10^{-9}$ |
| <b>Figure 4C</b> |                      |
| <b>Bicycle</b>   | <b>IC90 (M)</b>      |
| E3E5             | $1.7 \times 10^{-7}$ |
| E4E5             | $5.5 \times 10^{-8}$ |
| E2c Trimer       | $2.0 \times 10^{-7}$ |
| E2E4             | $1.3 \times 10^{-7}$ |
| <b>Figure 4D</b> |                      |
| <b>Bicycle</b>   | <b>IC90 (M)</b>      |
| E3E5             | $1.2 \times 10^{-6}$ |
| E4E5             | $6.0 \times 10^{-7}$ |
| E2c Trimer       | $1.3 \times 10^{-6}$ |
| E2E4             | $1.8 \times 10^{-6}$ |
| <b>Figure 4E</b> |                      |
| <b>Bicycle</b>   | <b>IC90 (M)</b>      |
| E3E5             | $4.9 \times 10^{-6}$ |
| E4E5             | $2.0 \times 10^{-4}$ |
| E2c Trimer       | $5.9 \times 10^{-6}$ |
| E2E4             | $9.7 \times 10^{-5}$ |
| <b>Figure 4F</b> |                      |
| <b>Bicycle</b>   | <b>IC90 (M)</b>      |
| E2E4             | $2.1 \times 10^{-7}$ |
| <b>Figure 4G</b> |                      |
| <b>Bicycle</b>   | <b>IC90 (M)</b>      |
| E3E5             | $3.3 \times 10^{-5}$ |
| E2c Trimer       | $1.6 \times 10^{-5}$ |

**Supplementary Figure 1: Immunofluorescence data of *Bicycles* inhibition of SARS-CoV-2 infection and cell-cell fusion. (a)** Quantification of NP expression in Vero TMPRSS2/ACE2 cells 18 hours post-infection with SARS-CoV-2 (Wuhan-Hu-1 strain) in the presence of homotrimeric E2 or biparatopic E2E4. Cells were fixed and stained with anti-NP antibody (CAT). A representative image of at least 3 biological replicates is shown. Data are presented as mean values +/- SEM. Ordinary one-way ANOVA was used for statistical analysis and significance indicated with respect to DMSO condition. **(b)** Immunofluorescence images of GFP positive syncytia 12 hours post-Spike transfection in the presence of E2E4 and E2 trimer *Bicycles* at a range of concentrations. Quantification of this data is shown in Figure 3E. Scale bar is 200  $\mu$ M.

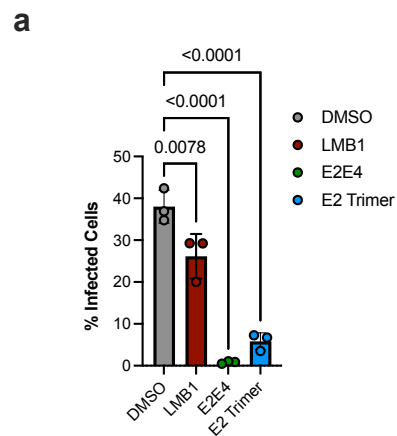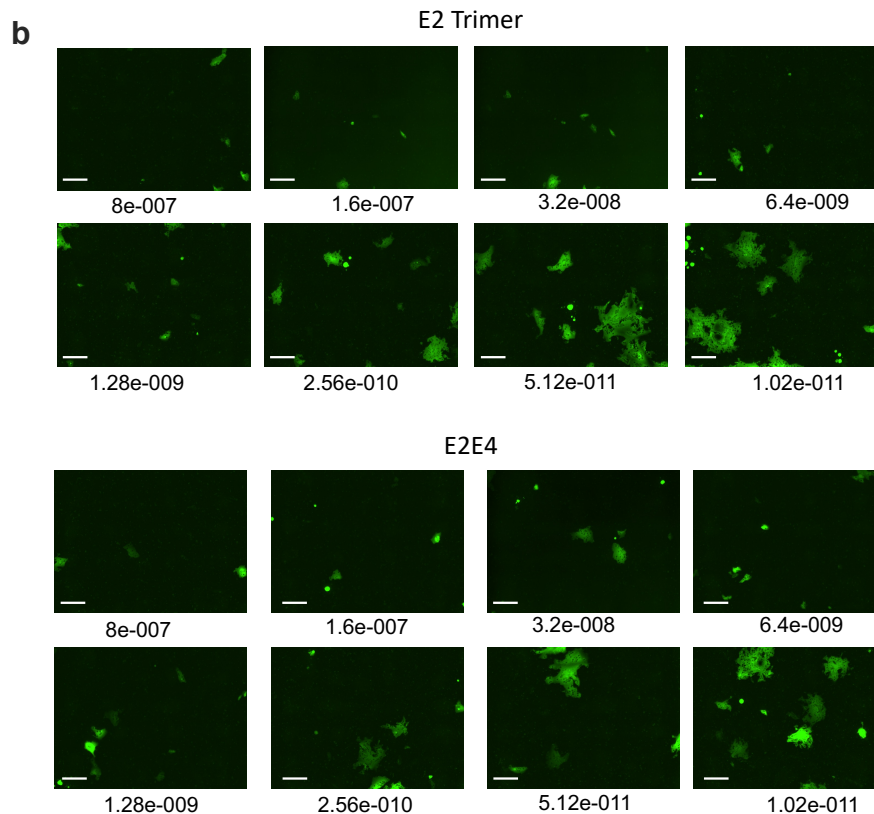

**Supplementary Figure 2: Summary of intravenous (i.v.) and sub-cutaneous (s.c.) pharmacokinetics for E2 trimer and E2E4 biparatopic. (A,B,C,D) Bicycle multimers were administered to both mice and hamsters (N=6, alternate composite sampling resulting in N=3 per timepoint) via i.v. and s.c. routes of administration. Bicycle plasma concentration over time data displayed as mean +/- standard deviation (SD) for N=3 biological replicates. (E) Pharmacokinetic parameters were subsequently evaluated.**

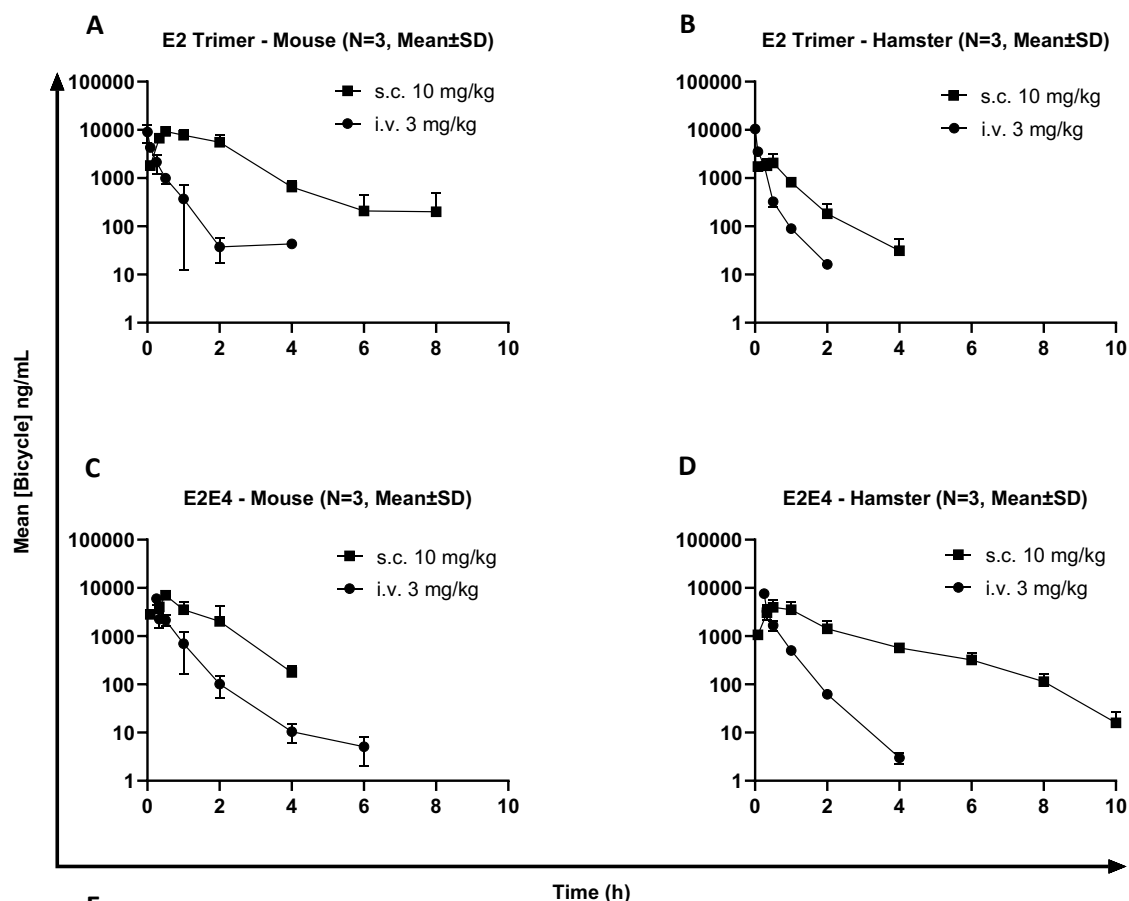

| Compound                           | BCY17021 |       |         |      | BCY18656 |      |         |      |
|------------------------------------|----------|-------|---------|------|----------|------|---------|------|
|                                    | Mouse    |       | Hamster |      | Mouse    |      | Hamster |      |
| Route of Administration            | i.v.     | s.c.  | i.v.    | s.c. | i.v.     | s.c. | i.v.    | s.c. |
| Nominal Dose (mg/kg)               | 3.0      | 10    | 3.0     | 10   | 3.0      | 10   | 3.0     | 10   |
| C <sub>max</sub> (ng/mL)           | 9000     | 9300  | 10000   | 2100 | 6000     | 7000 | 7600    | 4300 |
| T <sub>max</sub> (h)               | 0.0      | 0.5   | 0.0     | 0.5  | 0.25     | 0.5  | 0.25    | 0.6  |
| T <sub>1/2</sub> (h)               | 0.6      | 1.2   | 0.4     | 0.7  | 0.6      | 0.7  | 0.4     | 1.1  |
| V <sub>d<sub>ss</sub></sub> (L/kg) | 0.45     | -     | 0.27    | -    | 0.64     | -    | 0.46    | -    |
| Cl (mL/min/kg)                     | 16       | -     | 19      | -    | 20       | -    | 20      | -    |
| AUC <sub>0-inf</sub> (ng.h/mL)     | 3100     | 19000 | 2600    | 2100 | 2500     | 8900 | 2500    | 8600 |
| F (%)                              | -        | NR*   | -       | 16   | -        | 100  | -       | 100  |

\*inconsistent plasma concentration-time profile, therefore bioavailability not reported (NR).

**Supplementary Figure 3: Pharmacokinetic-pharmacodynamic (PKPD) models.** PKPD models were used to select an appropriate in vivo dosing regimen that would sustain a minimum of 90% target coverage at trough for both the E2 Trimer and E2E4 biparatopic. Using the appropriate data the target coverage predictions are; **(A)** E2 Trimer mouse s.c. administration **(B)** E2 Trimer hamster s.c. administration, **(C)** E2E4 biparatopic mouse s.c. administration **(D)** E2E4 biparatopic hamster s.c. administration. Each panel is expressed as % Bicycle Target Coverage over time where black dotted lines reference 90% coverage at 8 hours, indicating 90% target coverage at trough based on a t.i.d. dosing regimen.

**A** E2 Trimer Mouse Target Coverage Model s.c.

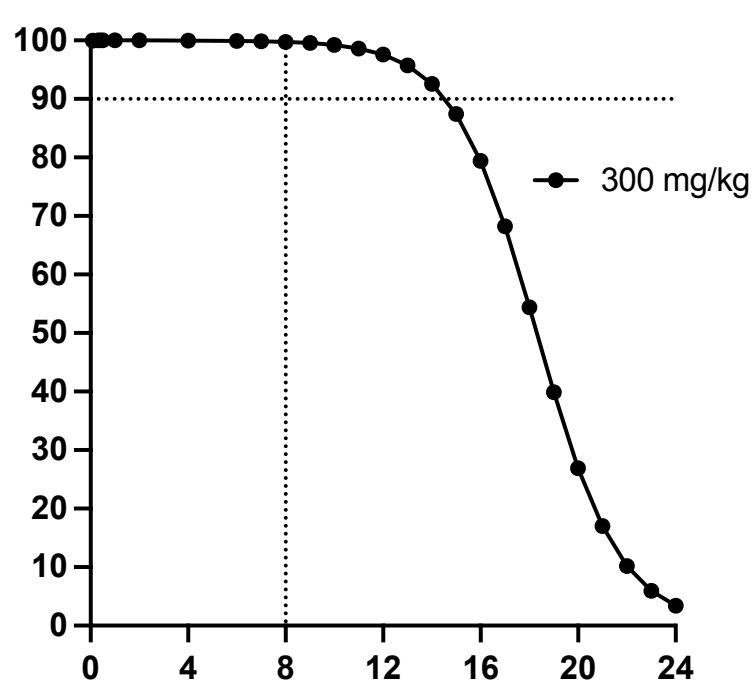

**B** E2 Trimer Hamster Target Coverage Model s.c.

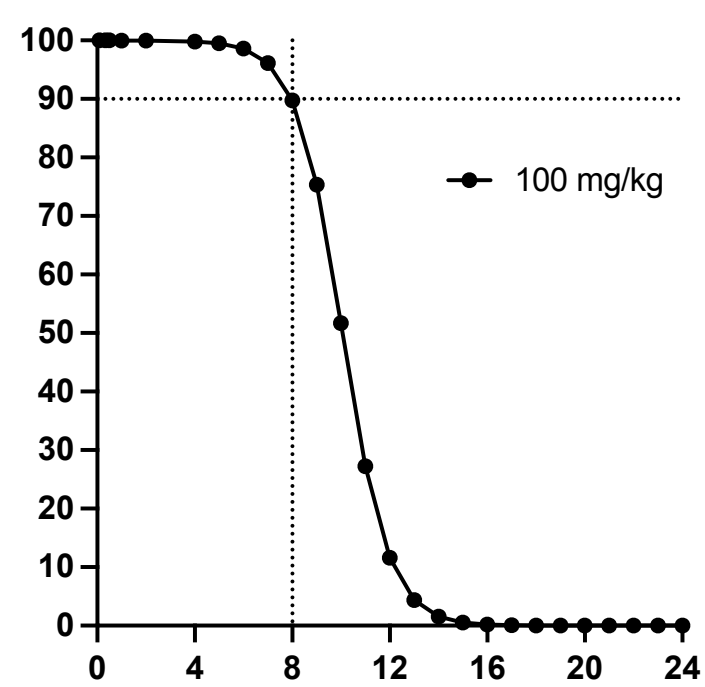

**C** E2E4 Mouse Target Coverage Model s.c.

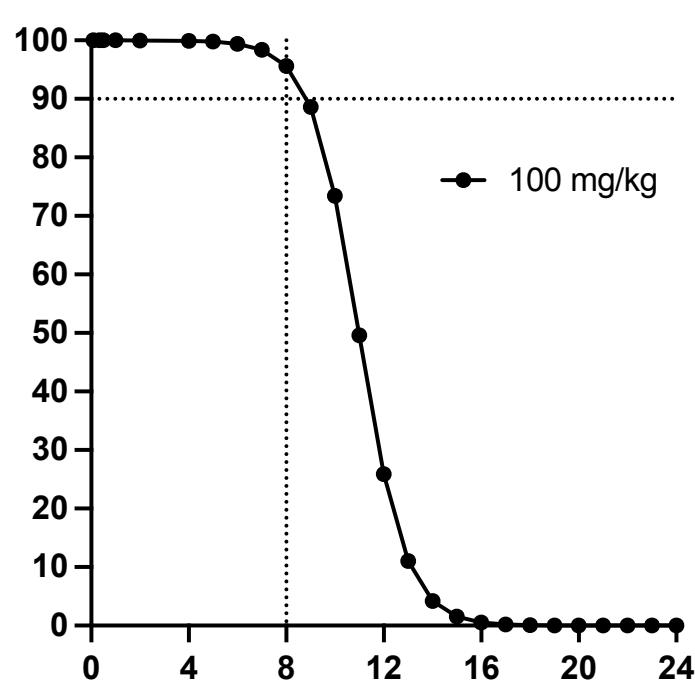

**D** E2E4 Hamster Target Coverage Model s.c.

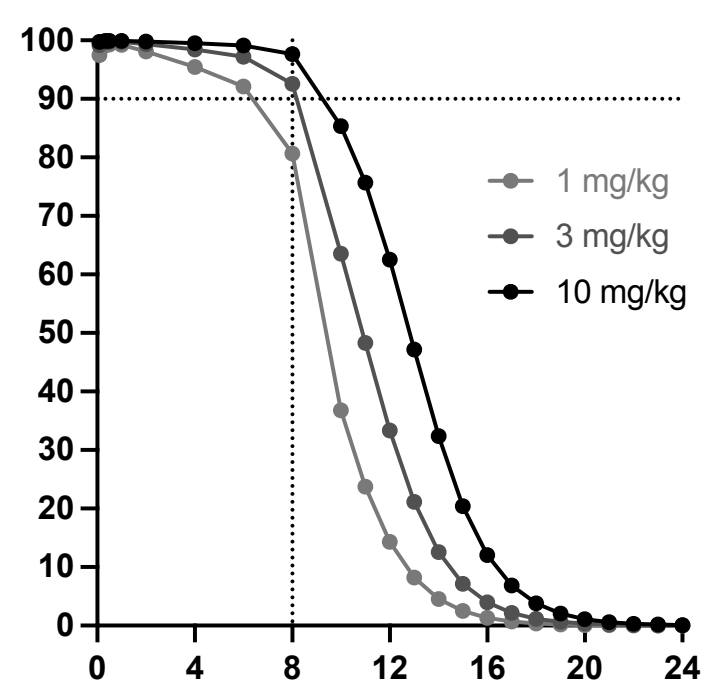

Time (h)
